# Supplementary material for: Catalyst-free transesterification vitrimers: activation via α-difluoroesters
Source: Royal Society of Chemistry journal article supplement (doi:10.1039/d2py00124a), 2022-01-01
Supplement: d2py00124a1.pdf [file d2py00124a1.pdf]

# Catalyst-Free Transesterification Vitrimers: activation via $\alpha$ -difluoroesters

## Supporting Information

Florian Cuminet,<sup>a</sup> Dimitri Berne,<sup>a</sup> Sébastien Lemouzy,<sup>a</sup> Éric Dantras,<sup>b</sup> Christine Joly-Duhamel,<sup>a</sup> Sylvain Caillol,<sup>a</sup> Éric Leclerc<sup>a</sup> and Vincent Ladmiral<sup>\*a</sup>

a ICGM, Univ Montpellier, CNRS, ENSCM, Montpellier, France

b CIRIMAT, Université Toulouse 3 Paul Sabatier, Physique des Polymères, 118 Route de Narbonne, 31062 Toulouse, France

\*Corresponding author: Vincent Ladmiral, email: vincent.ladmiral@enscm.fr

### Table of Contents

|                                                                                                                                        |    |
|----------------------------------------------------------------------------------------------------------------------------------------|----|
| <b>Catalyst-Free Transesterification Vitrimers: activation via <math>\alpha</math>-difluoroesters</b> .....                            | 1  |
| <b>Supporting Information</b> .....                                                                                                    | 1  |
| I. TPE-TE characterizations .....                                                                                                      | 3  |
| Figure S1. <sup>1</sup> H NMR spectrum of the triester TPE-TE in CDCl <sub>3</sub> .....                                               | 3  |
| Figure S2. <sup>19</sup> F NMR spectrum of the triester TPE-TE in CDCl <sub>3</sub> .....                                              | 4  |
| Figure S3. <sup>13</sup> C NMR spectrum of the triester TPE-TE in CDCl <sub>3</sub> .....                                              | 4  |
| Figure S4. <sup>1</sup> H NMR spectrum of the disubstituted byproduct in CDCl <sub>3</sub> .....                                       | 5  |
| Figure S5. <sup>19</sup> F NMR spectrum of the disubstituted byproduct in CDCl <sub>3</sub> .....                                      | 6  |
| Figure S6. <sup>13</sup> C NMR spectrum of the disubstituted byproduct in CDCl <sub>3</sub> .....                                      | 7  |
| Figure S7. COSY <sup>1</sup> H NMR spectrum of the disubstituted byproduct in CDCl <sub>3</sub> .....                                  | 8  |
| Figure S8. HSQC <sup>1</sup> H- <sup>13</sup> C NMR spectrum of the disubstituted byproduct in CDCl <sub>3</sub> .....                 | 9  |
| II. TPE-TAF characterizations .....                                                                                                    | 10 |
| Figure S9. <sup>1</sup> H NMR spectrum of the triacid TPE-TAF in acetone-d <sub>6</sub> . .....                                        | 10 |
| Figure S10. <sup>19</sup> F NMR spectrum of the triacid TPE-TAF in acetone-d <sub>6</sub> .....                                        | 11 |
| Figure S11. <sup>13</sup> C NMR spectrum of the triacid TPE-TAF in acetone-d <sub>6</sub> .....                                        | 12 |
| Figure S12. FTIR spectrum of the triacid TPE-TAF .....                                                                                 | 13 |
| Figure S13. TGA thermogram of the triacid TPE-TAF (air, 20 °C.min <sup>-1</sup> ).....                                                 | 14 |
| III. BDGE characterizations .....                                                                                                      | 15 |
| Figure S14. <sup>1</sup> H NMR spectrum of the commercial BDGE in CDCl <sub>3</sub> .....                                              | 15 |
| Figure S15. <sup>13</sup> C NMR spectrum of the commercial BDGE in CDCl <sub>3</sub> .....                                             | 16 |
| Figure S16. FTIR spectrum of the commercial BDGE .....                                                                                 | 17 |
| A. Experimental procedure for the determination of BDGE epoxy equivalent weight (EEW) by <sup>1</sup> H NMR in CDCl <sub>3</sub> ..... | 18 |
| B. Experimental procedure for the determination of BDGE epoxy equivalent weight (EEW) by DSC .....                                     | 19 |

|                                                                                                                                                                  |    |
|------------------------------------------------------------------------------------------------------------------------------------------------------------------|----|
| IV. TPE-TAF / BDGE vitrimer characterizations .....                                                                                                              | 20 |
| Figure S17. Determination of the gel time of the TPE-TAF/BDGE mixture at 20 °C by rheology ..                                                                    | 20 |
| Figure S18. DSC thermogram of the TPE-TAF/BDGE material after curing 3 h at 150 °C (nitrogen, 20 °C.min <sup>-1</sup> ) .....                                    | 21 |
| Table S1. Gel content of the pristine TPE-TAF/BDGE material after curing 3 h at 150 °C in various solvents .....                                                 | 22 |
| Figure S19. DMA thermogram of the pristine TPE-TAF/BDGE material after curing 3 h at 150 °C                                                                      | 22 |
| Figure S20. TGA thermogram of the pristine TPE-TAF/BDGE material after curing 3 h at 150 °C (air, 20 °C min <sup>-1</sup> ) .....                                | 23 |
| Table S2. Equation and fitting parameters of the Kohlrausch-Williams-Watts stretched exponential model for the stress relaxation experiments .....               | 23 |
| Figure S21. FTIR spectrum of the cured TPE-TAF/BDGE material.....                                                                                                | 24 |
| Figure S22. Stacked FTIR spectra of TPE-TAF, BDGE, material after gelation 4 days at room temperature and TPE-TAF/BDGE material after curing 3 h at 150 °C ..... | 25 |

I. TPE-TE characterizations

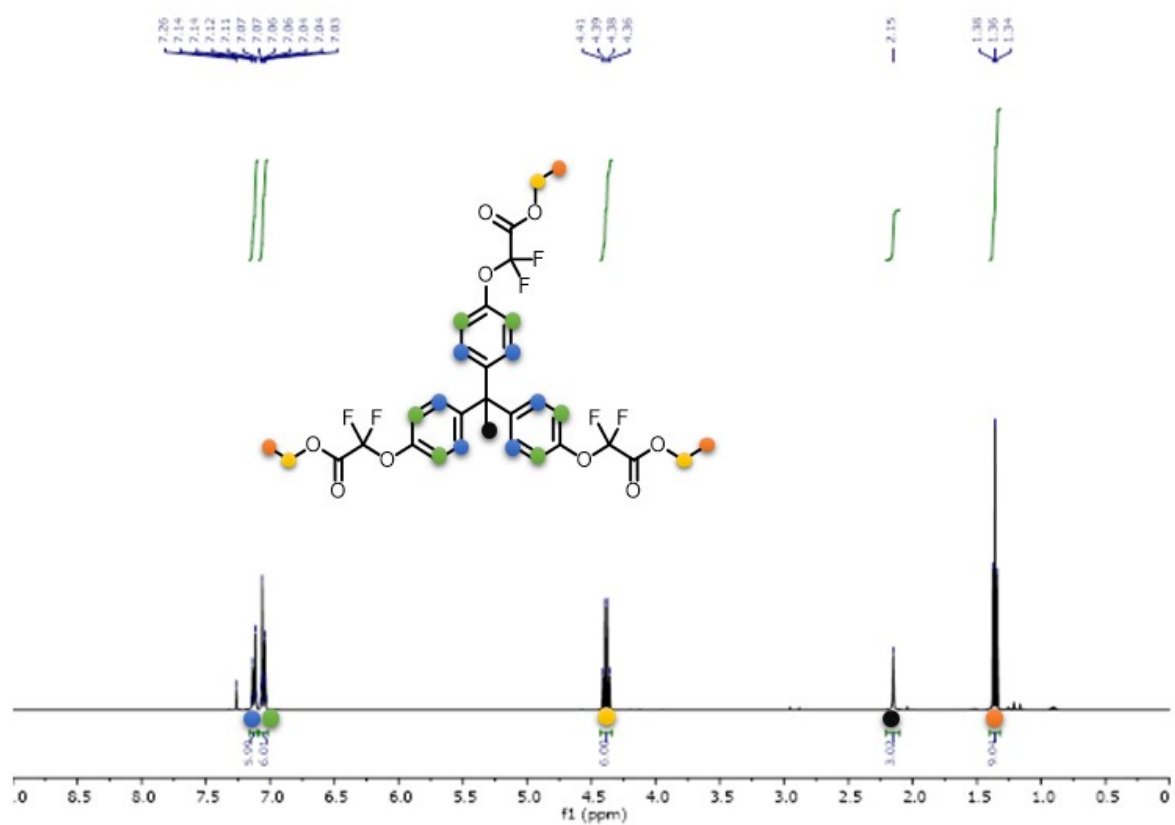

Figure S1.  $^1\text{H}$  NMR spectrum of the triester TPE-TE in  $\text{CDCl}_3$

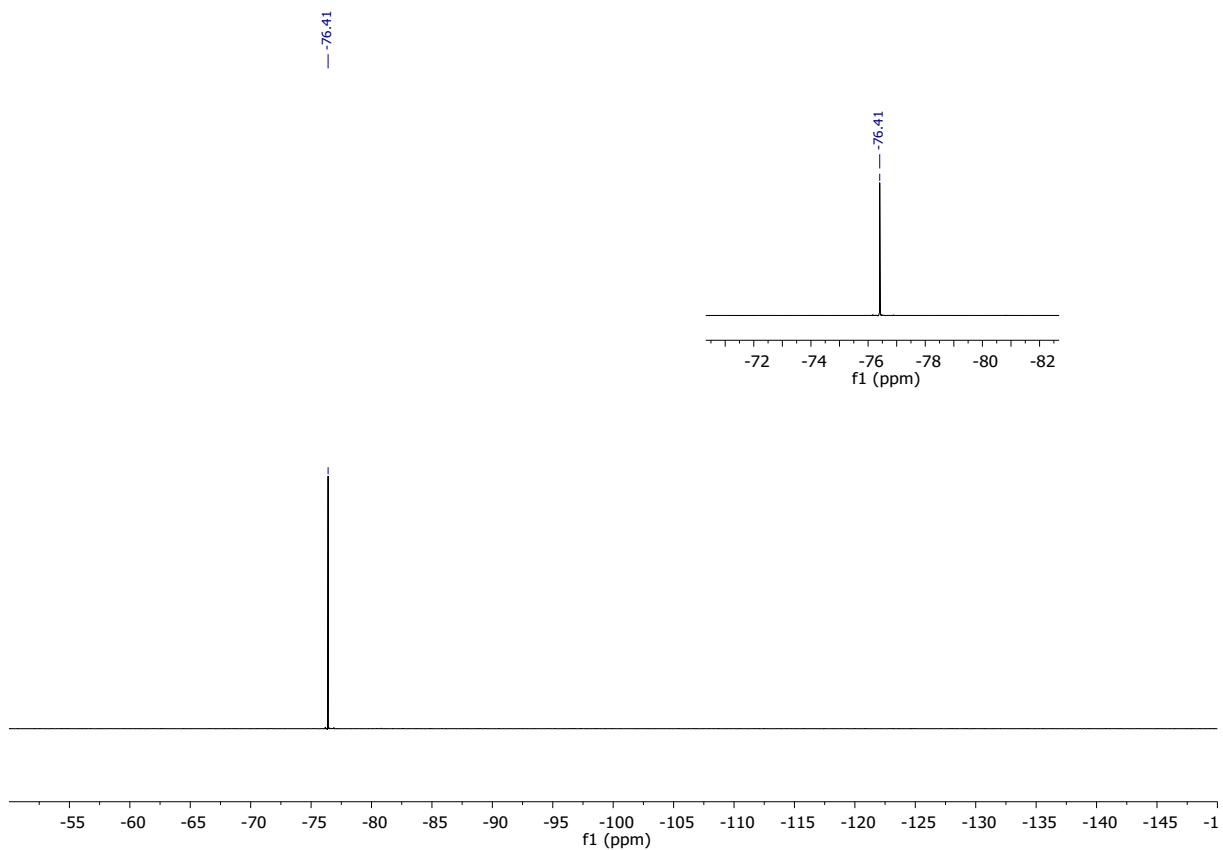

Figure S2.  $^{19}\text{F}$  NMR spectrum of the triester TPE-TE in  $\text{CDCl}_3$

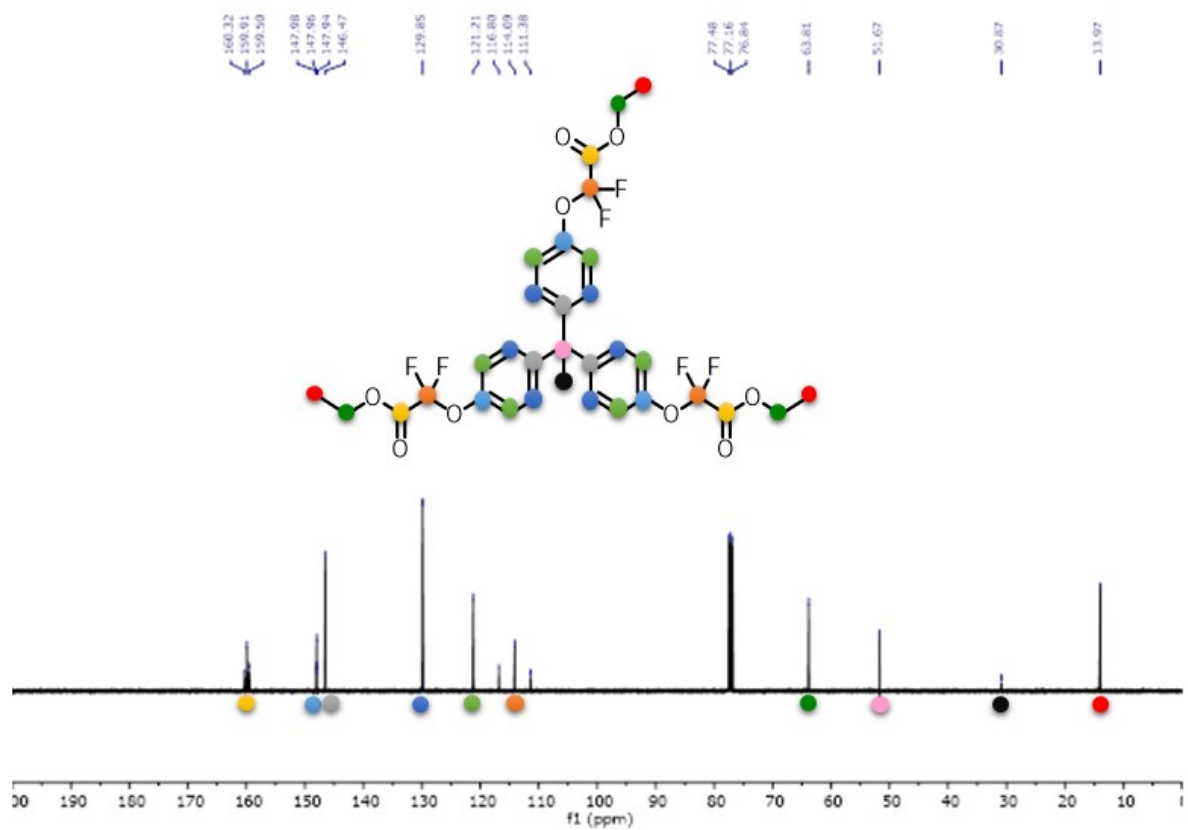

Figure S3.  $^{13}\text{C}$  NMR spectrum of the triester TPE-TE in  $\text{CDCl}_3$

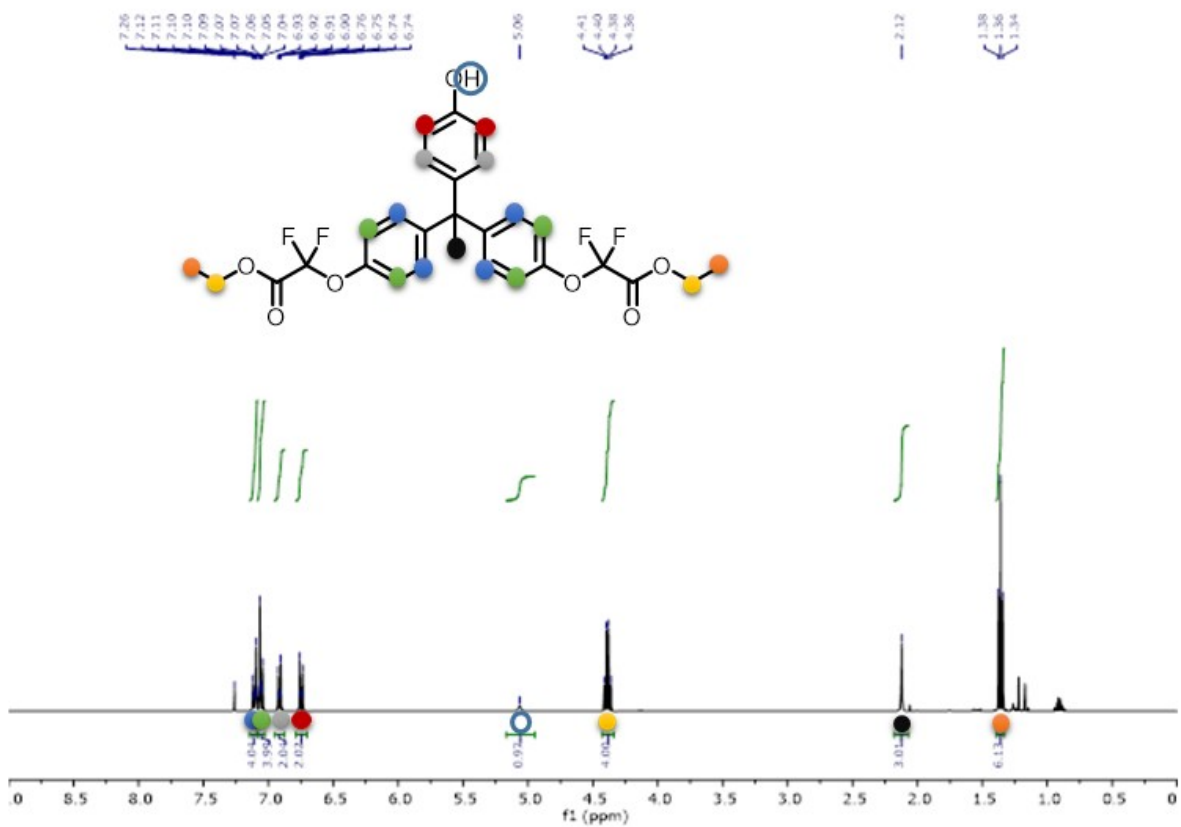

Figure S4.  $^1\text{H}$  NMR spectrum of the disubstituted byproduct in  $\text{CDCl}_3$

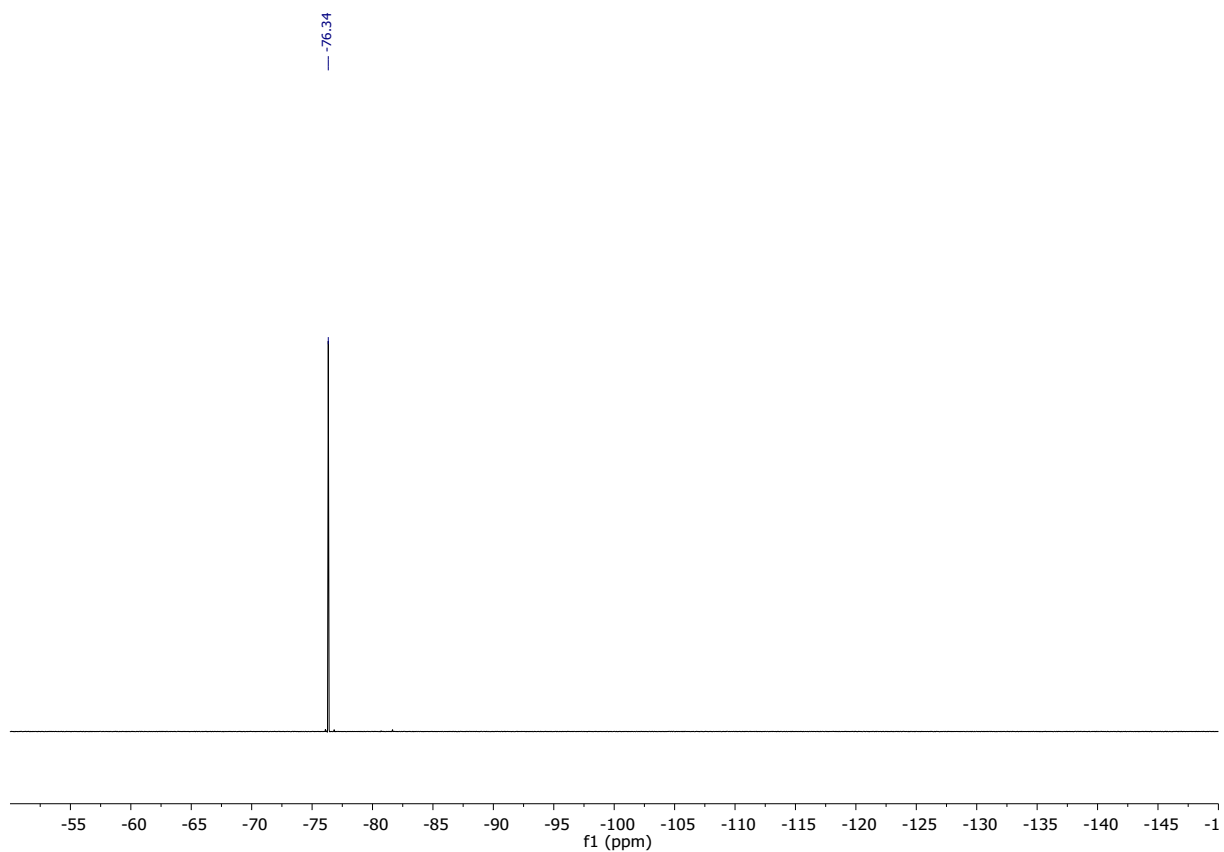

Figure S5.  $^{19}\text{F}$  NMR spectrum of the disubstituted byproduct in  $\text{CDCl}_3$

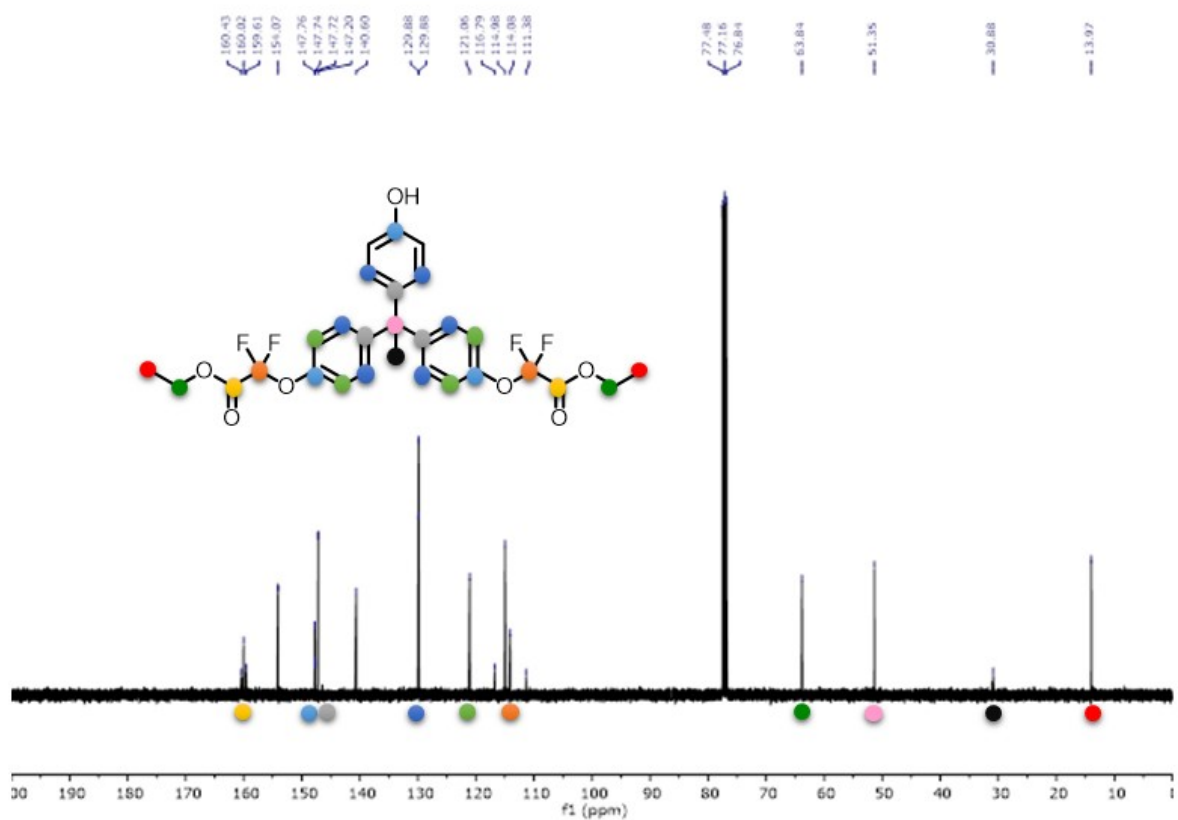

Figure S6.  $^{13}\text{C}$  NMR spectrum of the disubstituted byproduct in  $\text{CDCl}_3$

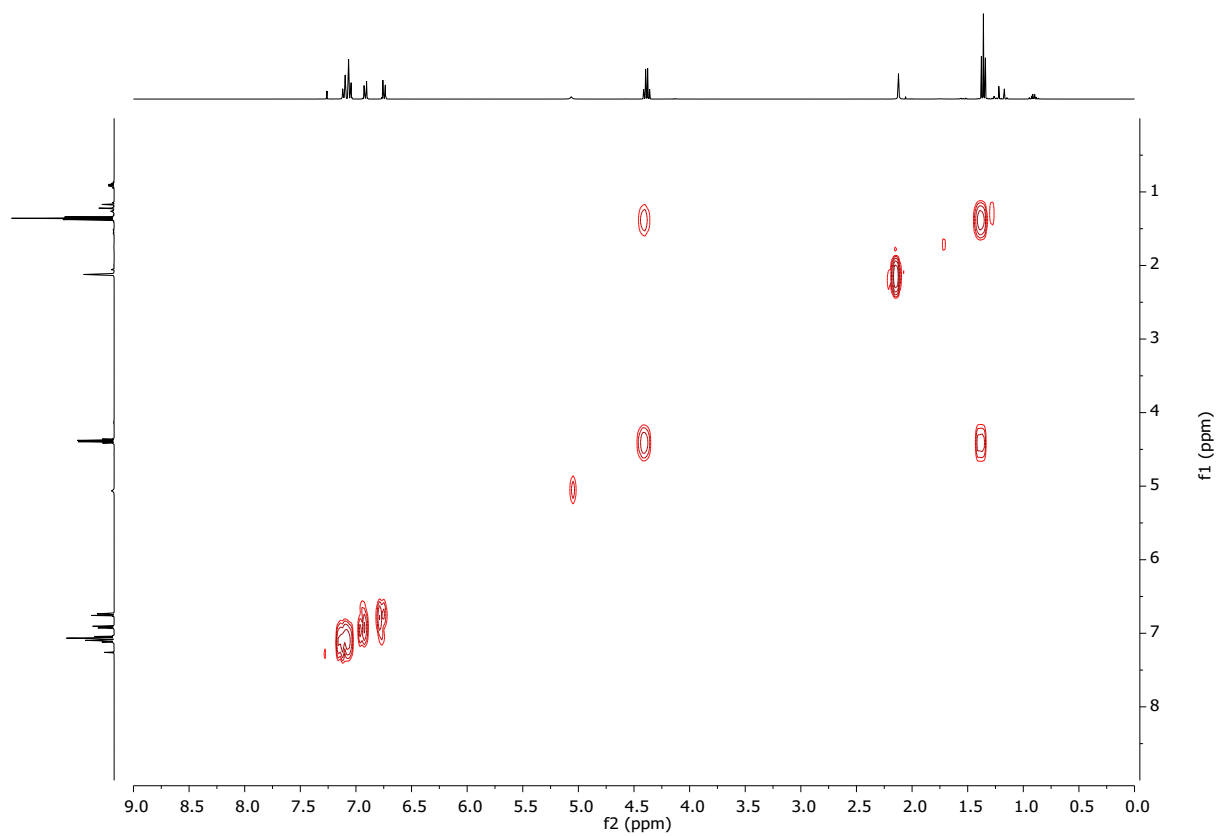

Figure S7. COSY <sup>1</sup>H NMR spectrum of the disubstituted byproduct in CDCl<sub>3</sub>

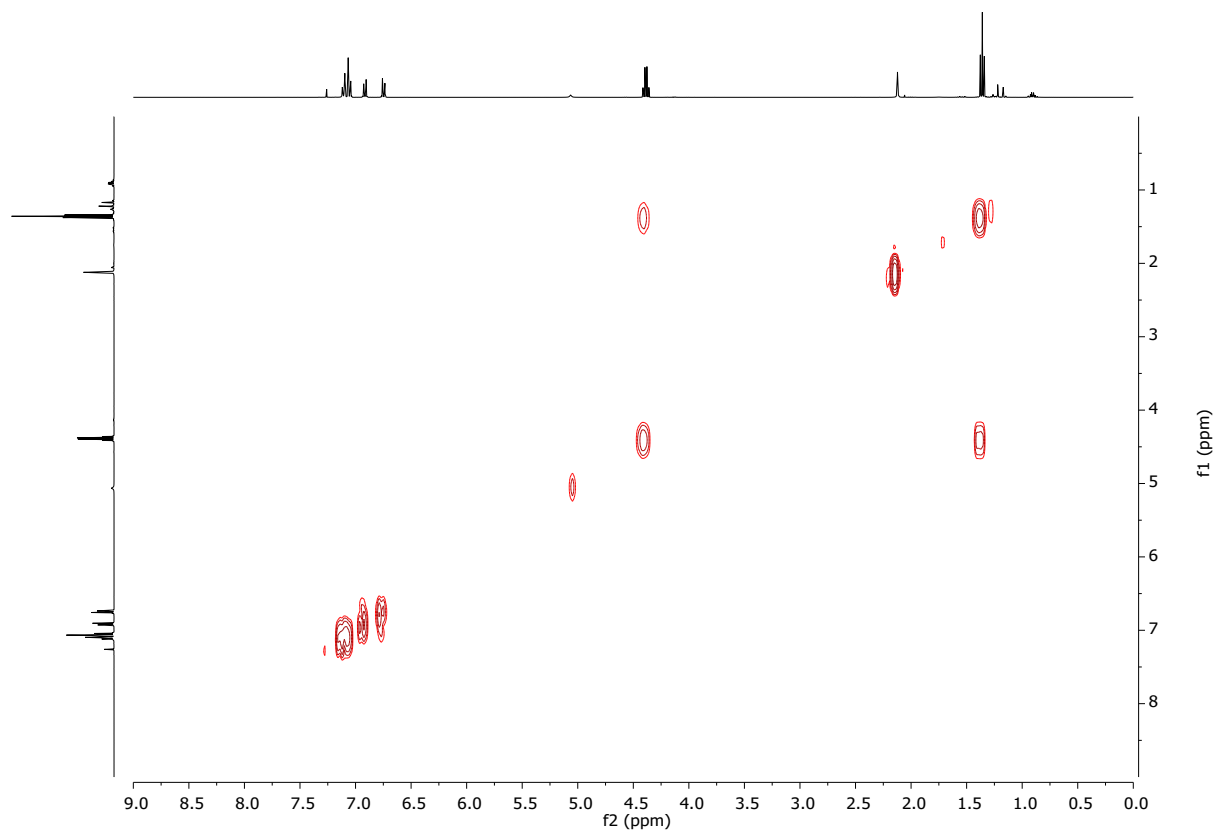

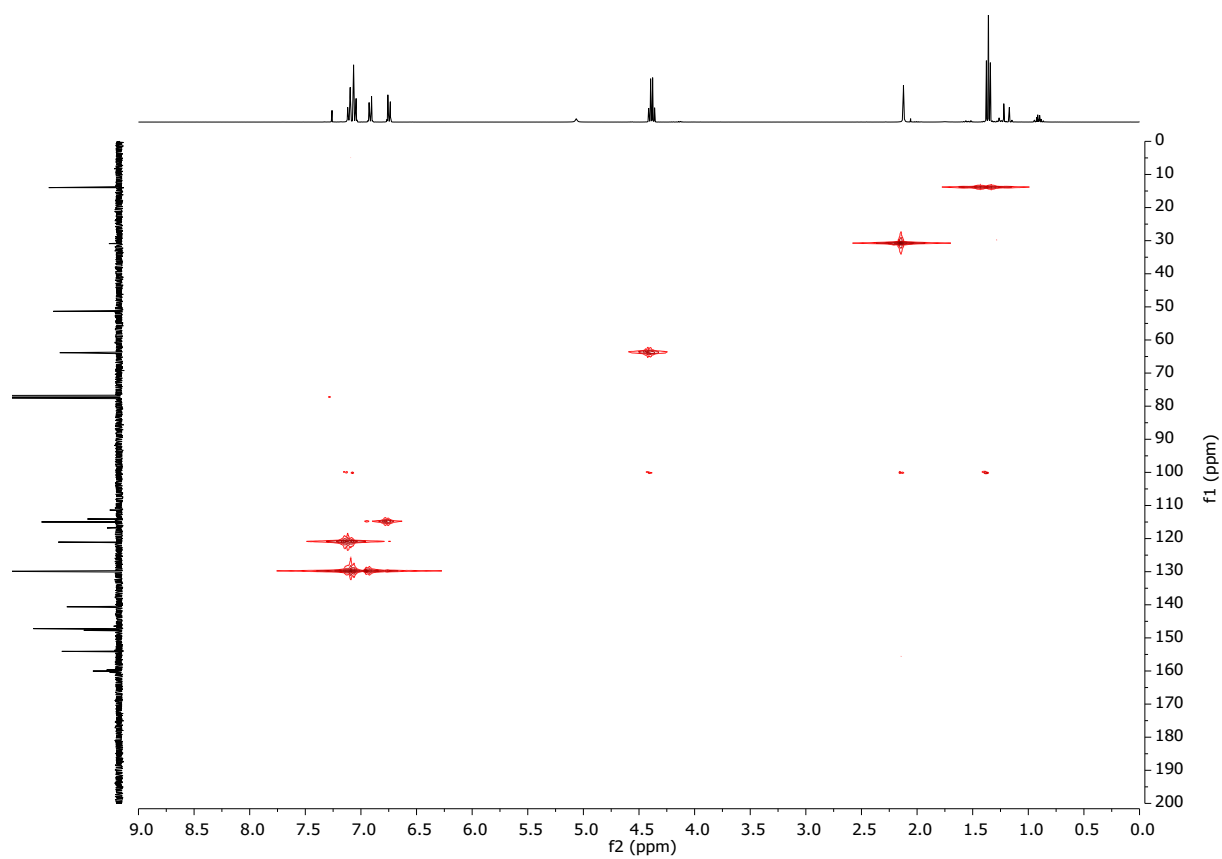

Figure S8. HSQC  $^1\text{H}$ - $^{13}\text{C}$  NMR spectrum of the disubstituted byproduct in  $\text{CDCl}_3$



## II. TPE-TAF characterizations

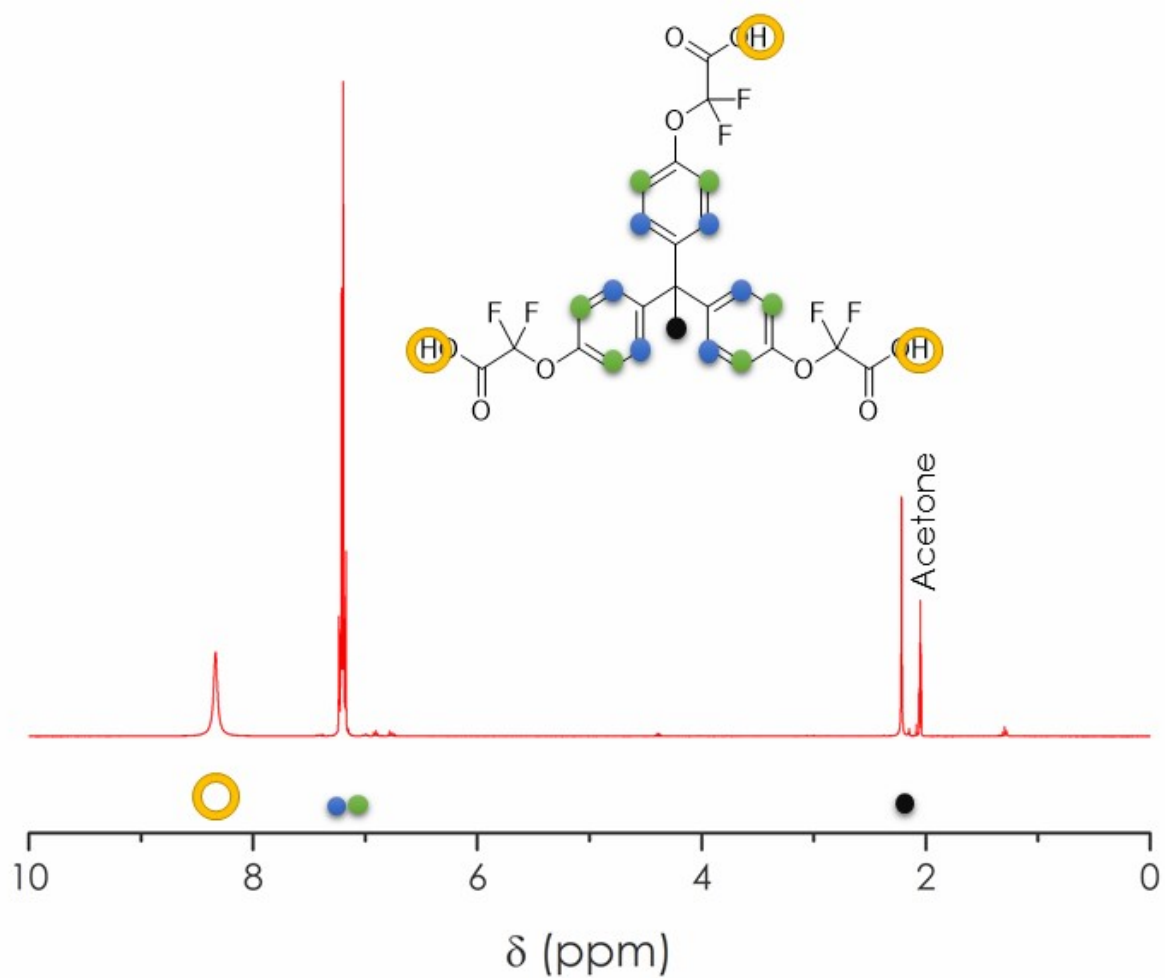

Figure S9.  $^1\text{H}$  NMR spectrum of the triacid TPE-TAF in acetone- $d_6$ .

Very small signals at 1.30 and 4.39 ppm corresponds to residual ester functions (which amount to less than 2mol% compared to the acid groups).

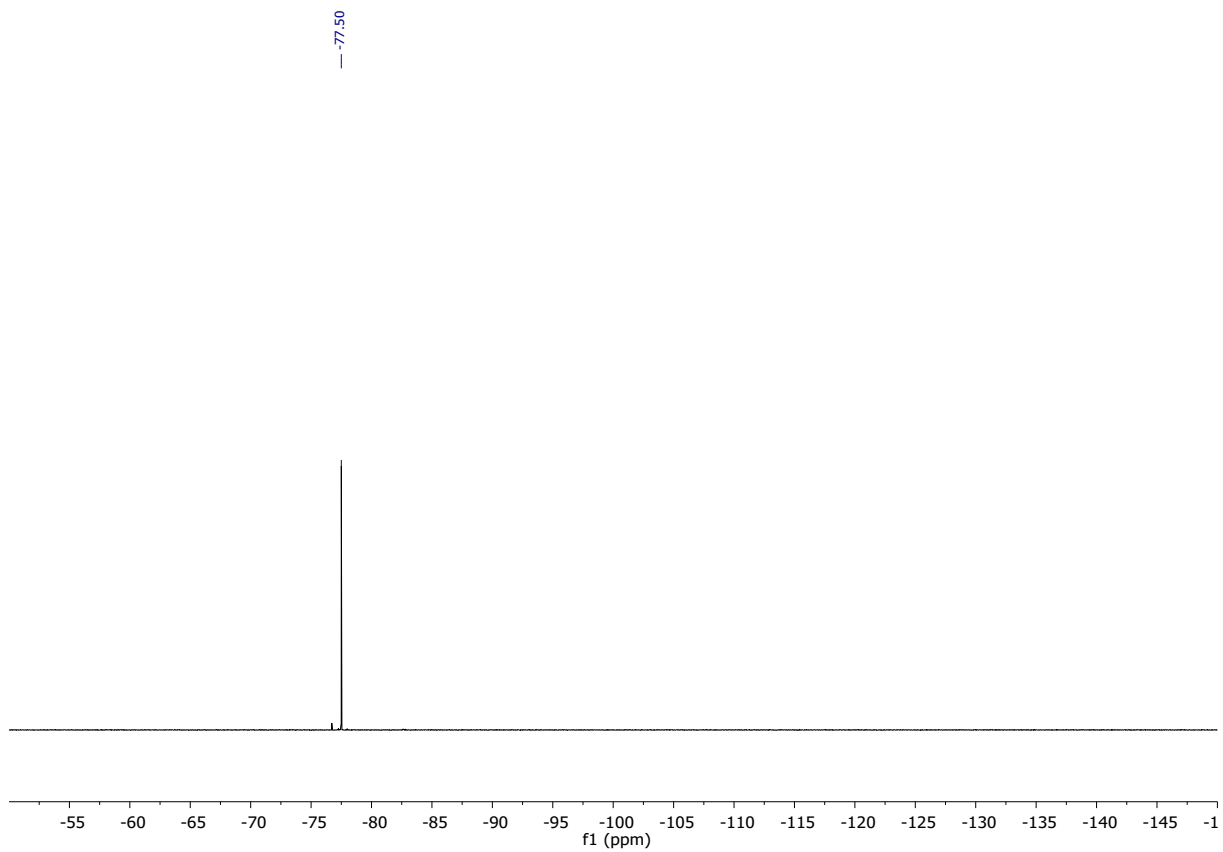

Figure S10.  $^{19}\text{F}$  NMR spectrum of the triacid TPE-TAF in acetone- $\text{d}_6$

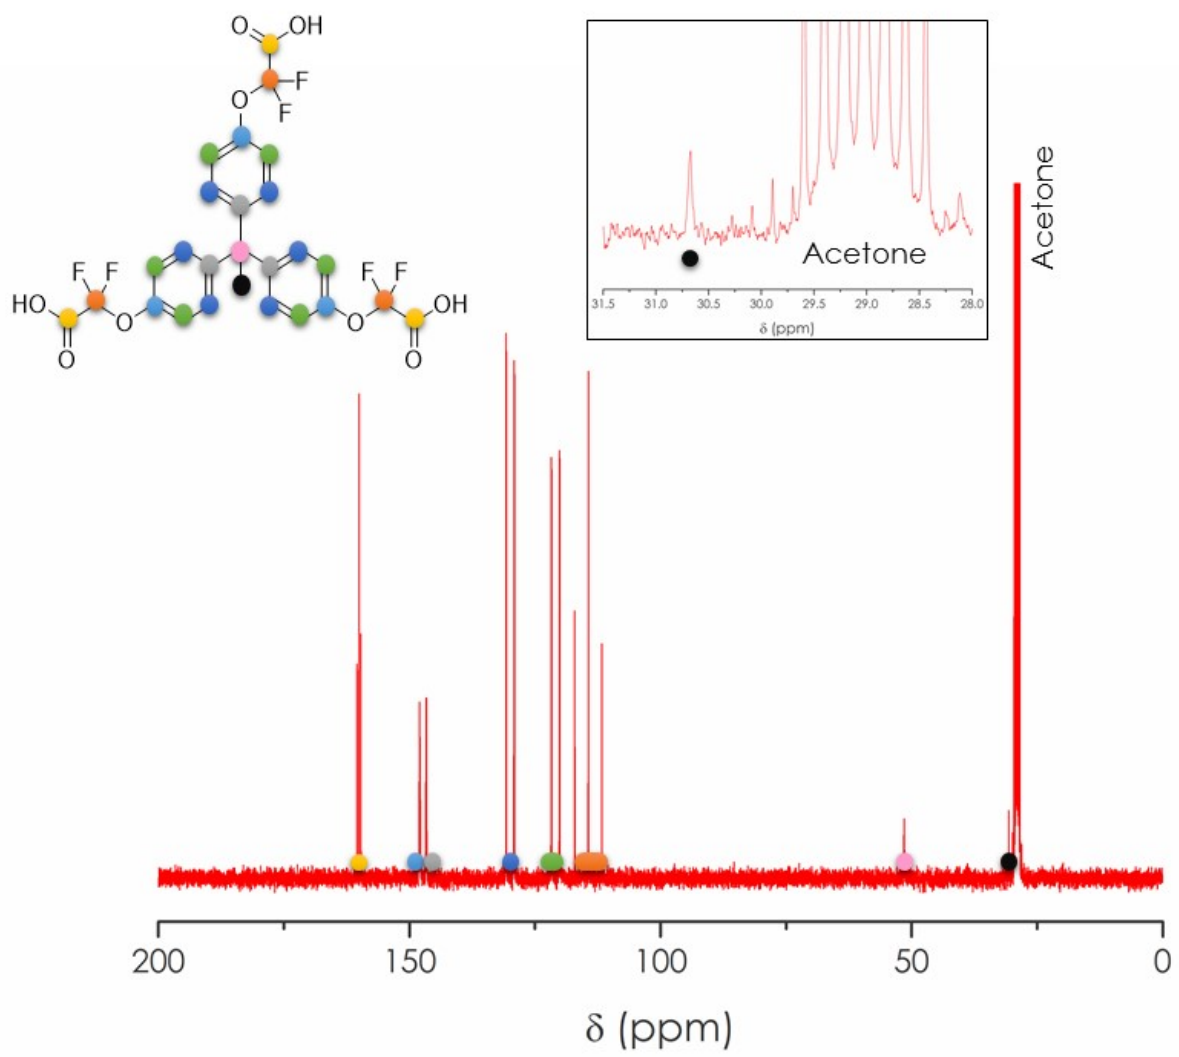

Figure S11.  $^{13}\text{C}$  NMR spectrum of the triacid TPE-TAF in acetone- $\text{d}_6$

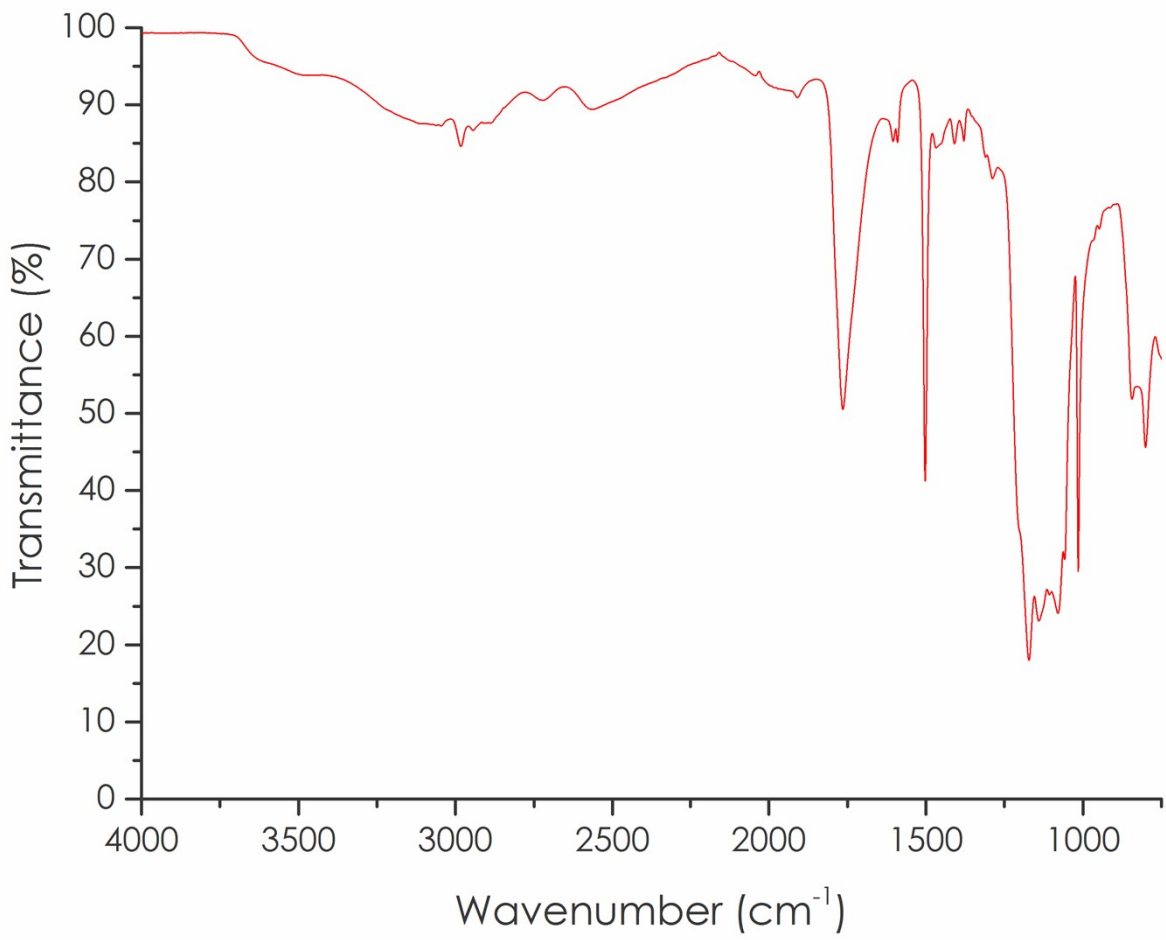

Figure S12. FTIR spectrum of the triacid TPE-TAF

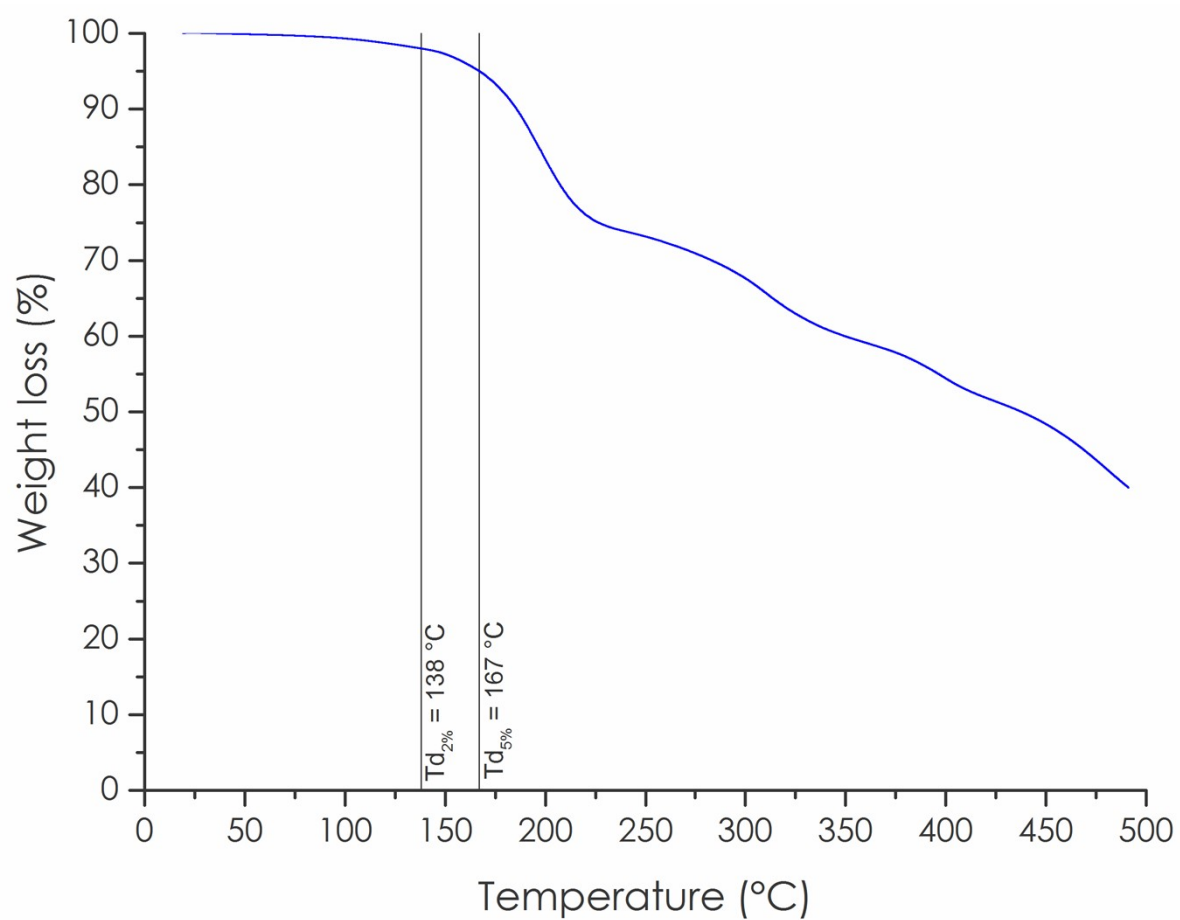

Figure S13. TGA thermogram of the triacid TPE-TAF (air, 20 °C.min<sup>-1</sup>)

III. BDGE characterizations

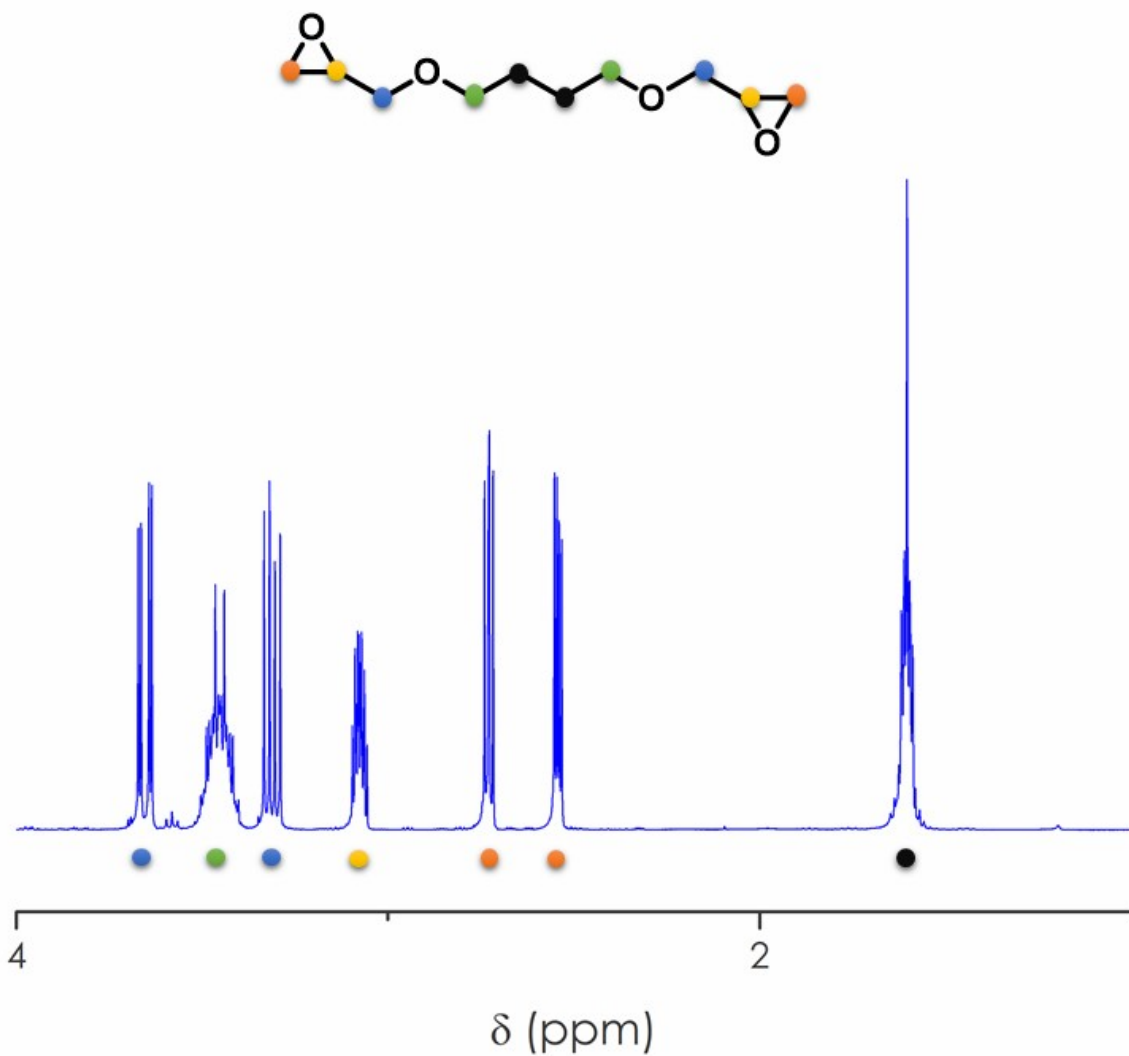

Figure S14. <sup>1</sup>H NMR spectrum of the commercial BDGE in CDCl<sub>3</sub>

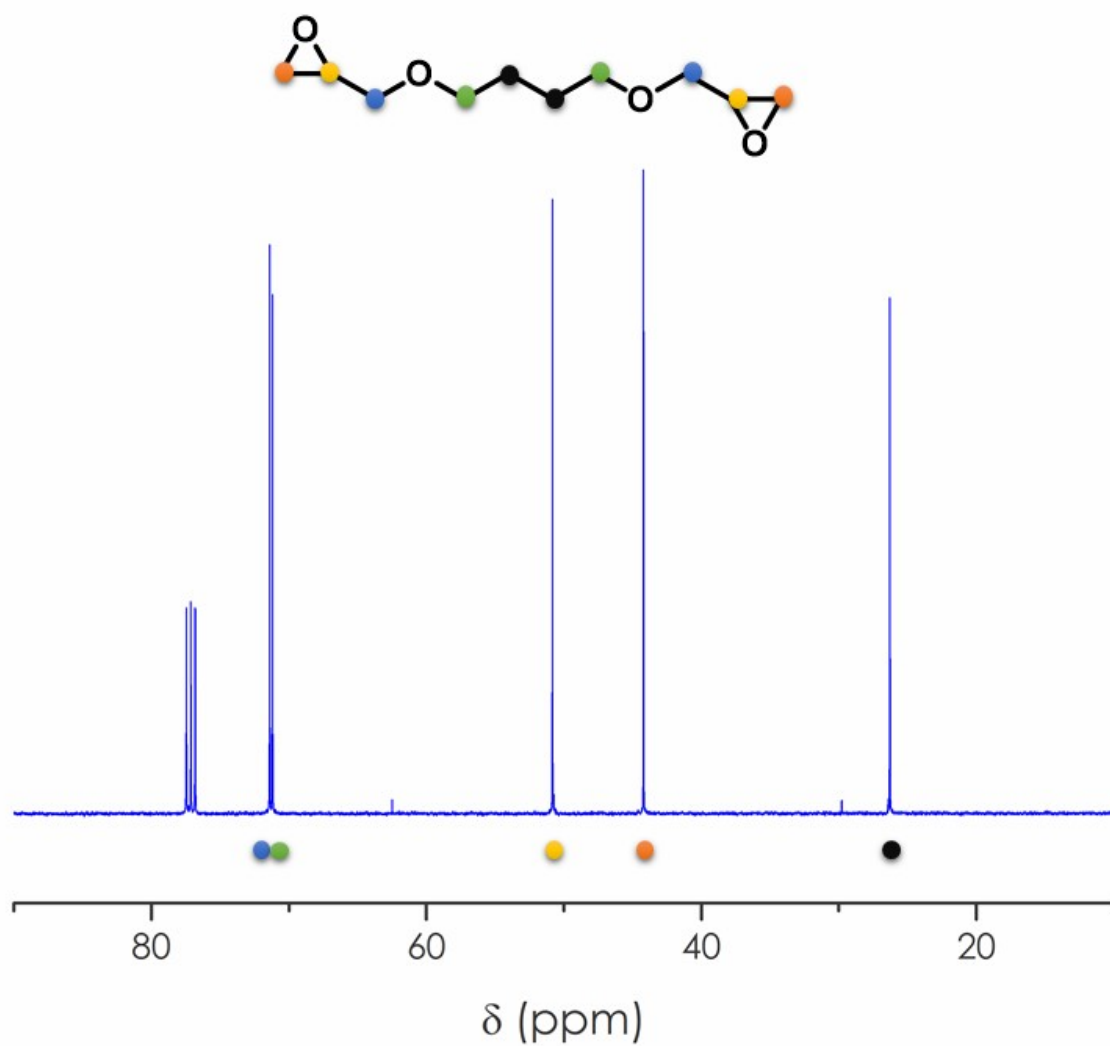

Figure S15.  $^{13}\text{C}$  NMR spectrum of the commercial BDGE in  $\text{CDCl}_3$

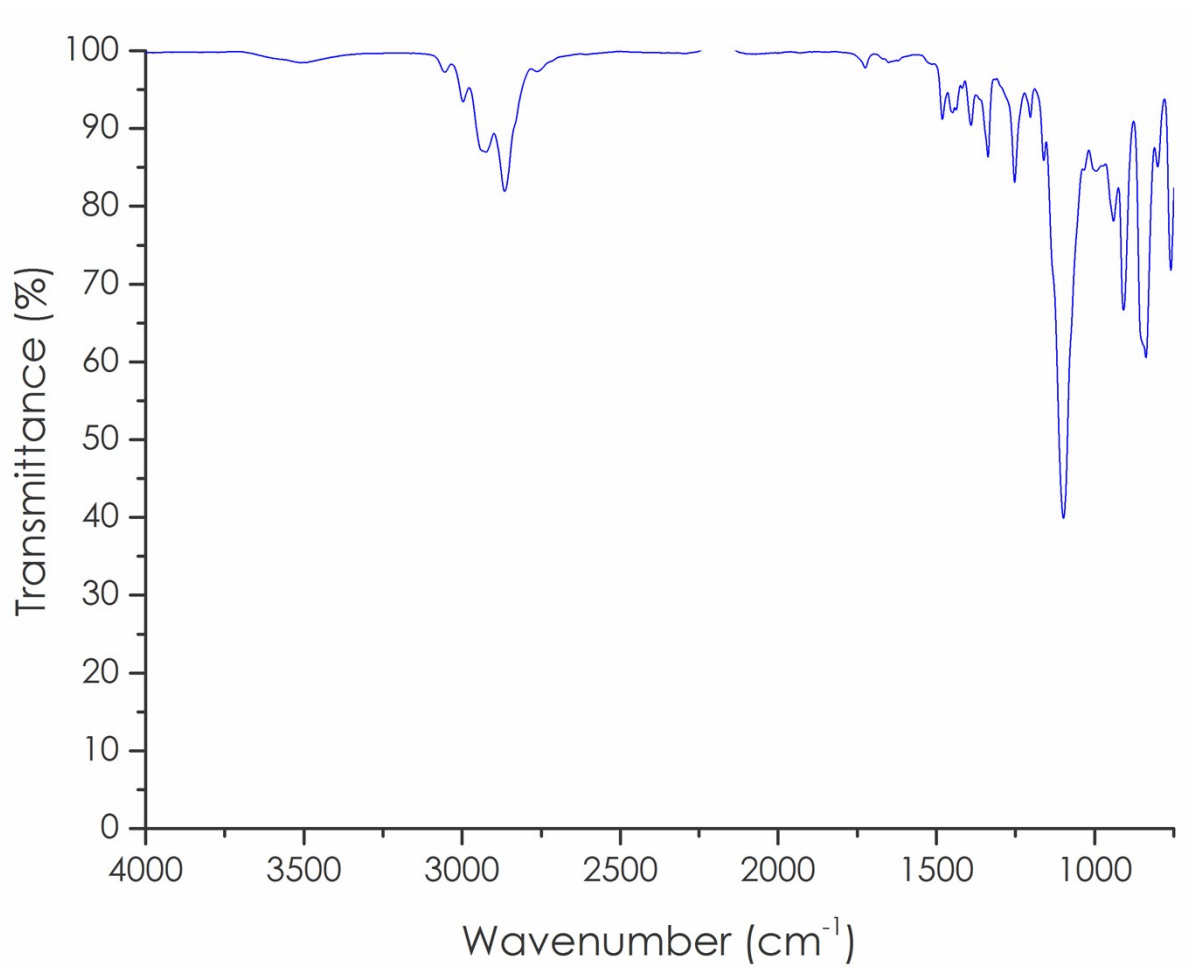

Figure S16. FTIR spectrum of the commercial BDGE



A. Experimental procedure for the determination of BDGE epoxy equivalent weight (EEW) by  $^1\text{H}$  NMR in  $\text{CDCl}_3$

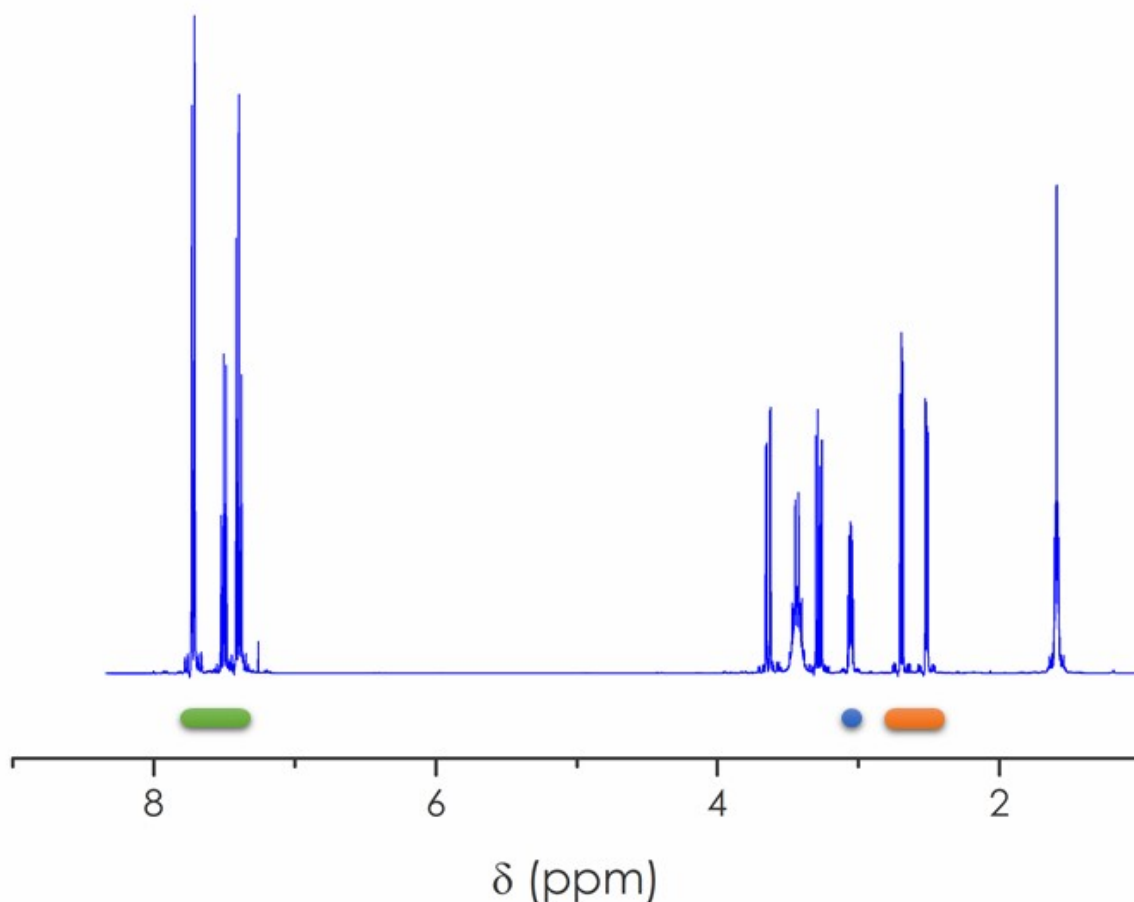

50 to 70 mg of BDGE and 50 to 80 mg of benzophenone were dissolved in deuterated chloroform.  $^1\text{H}$  NMR spectra were integrated in the 7.87-7.28 ppm range for benzophenone protons (10 H), in the 3.19-2.97 ppm range for CH oxirane and in the 2.82-2.45 range for  $\text{CH}_2$  oxirane. EEW was calculated as follows :

$$EEW_{CH} = \frac{m_{BDGE} \times \int_{7.28}^{7.87} \text{benzophenone} \times M_{\text{benzophenone}}}{10 \times m_{\text{benzophenone}} \times \int_{2.97}^{3.19} \text{CH oxirane}}$$

$$EEW_{CH_2} = \frac{2 \times m_{BDGE} \times \int_{7.28}^{7.87} \text{benzophenone} \times M_{\text{benzophenone}}}{10 \times m_{\text{benzophenone}} \times \int_{2.45}^{2.82} \text{CH}_2 \text{ oxirane}}$$

| $m_{BDGE}$<br>(mg) | $m_{benzophenone}$ (mg) | $\frac{\int_{2.97}^{3.19} CH \text{ oxirane}}{\int_{7.28}^{7.87} benzophenone}$ | $\frac{\int_{2.45}^{2.82} CH_2 \text{ oxirane}}{\int_{7.28}^{7.87} benzophenone}$ | $EEW_{CH}$          | $EEW_{CH_2}$ |
|--------------------|-------------------------|---------------------------------------------------------------------------------|-----------------------------------------------------------------------------------|---------------------|--------------|
| 73.3               | 80.9                    | 0.157                                                                           | 0.324                                                                             | 117                 | 113          |
| 54.6               | 80.0                    | 0.117                                                                           | 0.241                                                                             | 118                 | 115          |
| 57.8               | 50.7                    | 0.197                                                                           | 0.406                                                                             | 117                 | 114          |
| <b>Average EEW</b> |                         |                                                                                 |                                                                                   | <b>115 ± 4 g/eq</b> |              |

B. Experimental procedure for the determination of BDGE epoxy equivalent weight (EEW) by DSC

To confirm the EEW value obtained by NMR, a DSC study was performed. Thermosets of BDGE and succinic acid were made with different stoichiometric ratios. The  $T_g$  of the thermosets was measured by DSC, the maximum value corresponding to a acid/epoxy function ratio of 1:1, allowing to calculate the corresponding EEW, knowing the acid HEW (hydrogen equivalent weight). HEW of succinic acid is 59 g/eq.

The coarse acid powder was first crushed in a mortar to obtain a powder as thin as possible. Then it was mixed manually with the right amount of BDGE in a tube. The tube was sealed with a septum and cured overnight at 200 °C in an oven. The thermosets obtained were analysed by DSC (-100 to + 150 °C at 20 °C/min). The  $T_g$  was determined upon second heating ramp. The optimal ratio was 1:1, which confirmed the EEW determined by NMR.

| $m_{succinic \text{ acid}}$ (mg) | $m_{BDGE}$ (mg) | Ratio (based on NMR EEW) | $T_g$ (°C) |
|----------------------------------|-----------------|--------------------------|------------|
| 66.9                             | 119             | 0.91                     | 7.9        |
| 70.1                             | 134.5           | 0.99                     | 8          |
| 81.6                             | 158.6           | 1.00                     | 9.4        |
| 76.1                             | 156             | 1.05                     | 7.7        |
| 82.8                             | 178.4           | 1.11                     | 3.7        |
| 86.9                             | 206.9           | 1.22                     | 3.3        |

#### IV. TPE-TAF / BDGE vitrimer characterizations

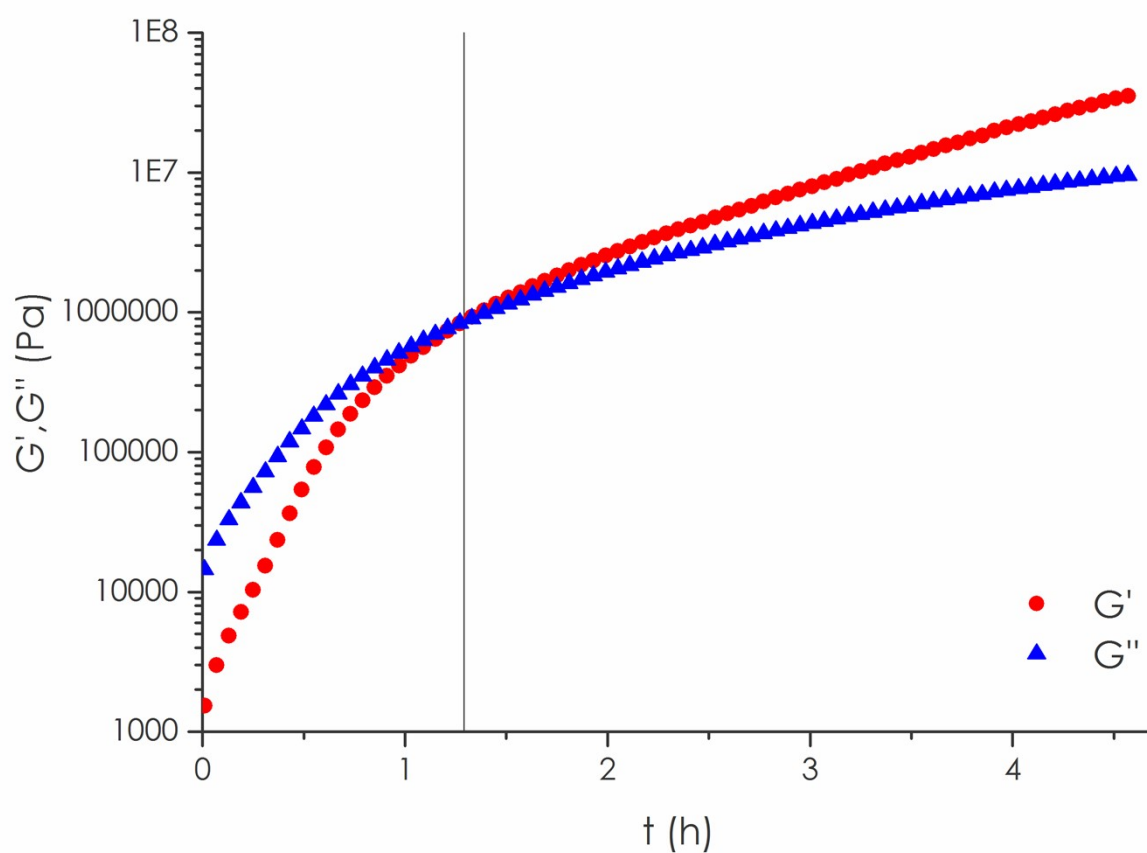

Figure S17. Determination of the gel time of the TPE-TAF/BDGE mixture at 20 °C by rheology

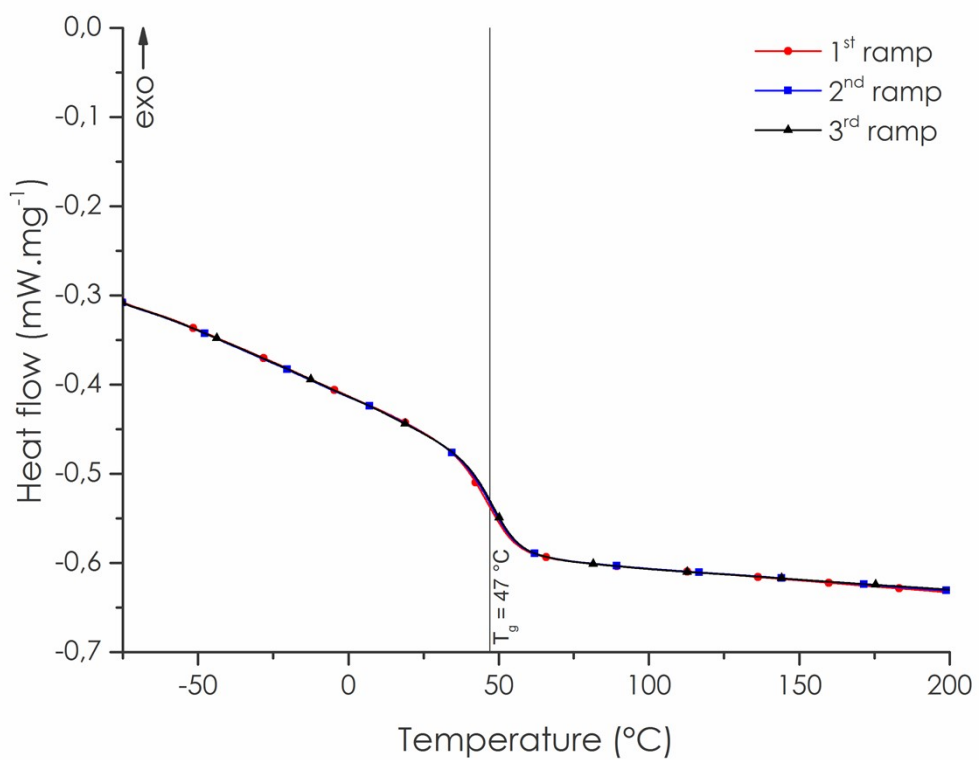

Figure S18. DSC thermogram of the TPE-TAF/BDGE material after curing 3 h at 150 °C (nitrogen, 20 °C.min<sup>-1</sup>)

Table S1. Gel content of the pristine TPE-TAF/BDGE material after curing 3 h at 150 °C in various solvents

| Solvent | Acetone | THF | Toluene | Cyclohexane | DMSO | CH <sub>2</sub> Cl <sub>2</sub> | Acetonitrile |
|---------|---------|-----|---------|-------------|------|---------------------------------|--------------|
| GC (%)  | 94      | 94  | 99      | 99          | 96   | 97                              | 96           |

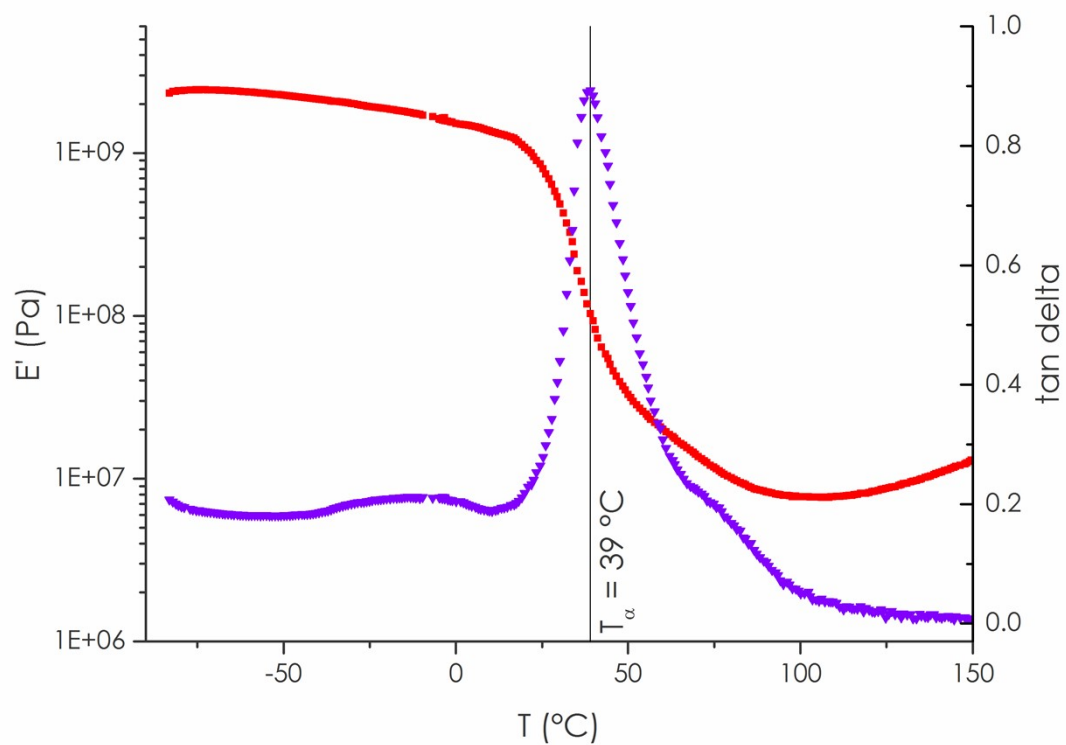

Figure S19. DMA thermogram of the pristine TPE-TAF/BDGE material after curing 3 h at 150 °C

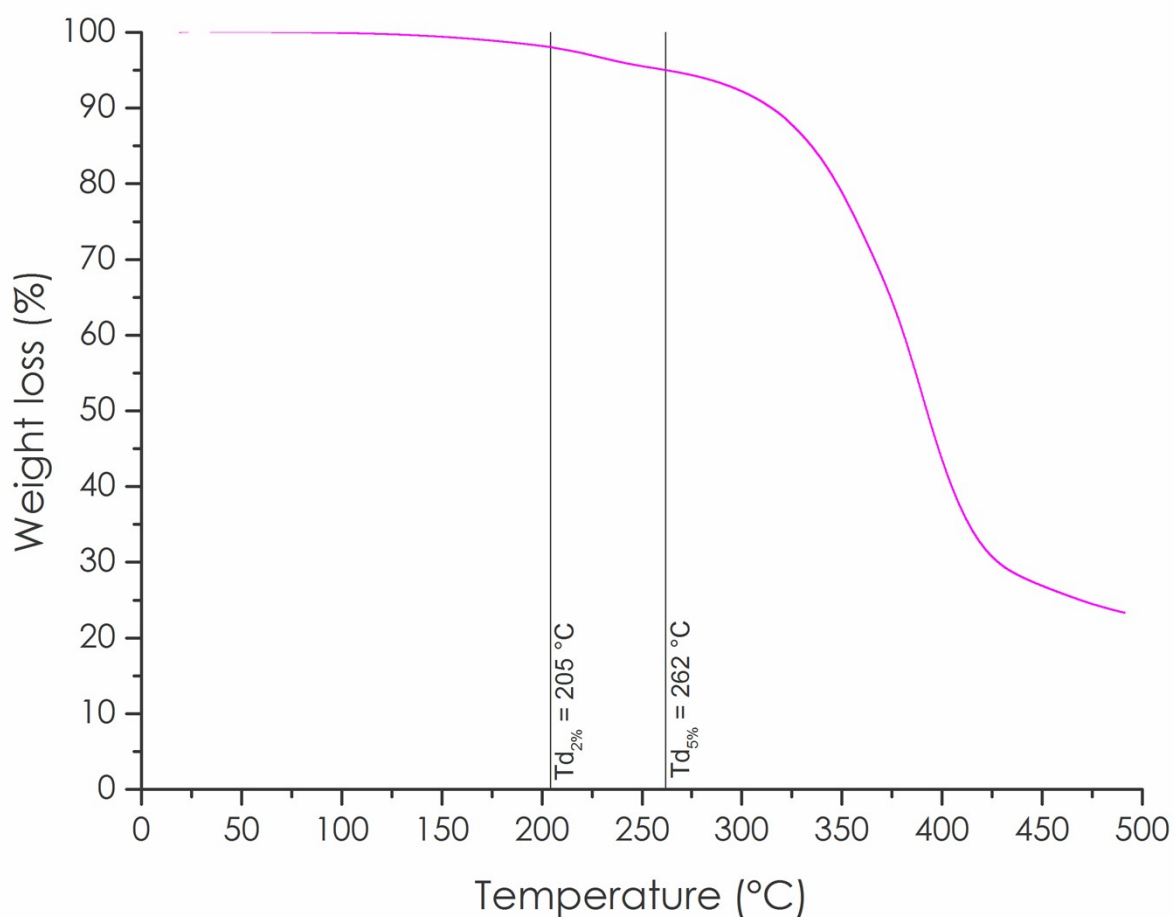

Figure S20. TGA thermogram of the pristine TPE-TAF/BDGE material after curing 3 h at 150 °C (air, 20 °C min<sup>-1</sup>)

Table S2. Equation and fitting parameters of the Kohlrausch-Williams-Watts stretched exponential model for the stress relaxation experiments

|                                                       |                |         |         |         |         |         |
|-------------------------------------------------------|----------------|---------|---------|---------|---------|---------|
| $\frac{G}{G_0} = e\left(\frac{-t}{\tau}\right)^\beta$ | T (°C)         | 170     | 180     | 190     | 200     | 210     |
|                                                       | $\tau$ (s)     | 79692   | 43025   | 30376   | 20772   | 13097   |
|                                                       | $\beta$        | 0.57    | 0.58    | 0.58    | 0.53    | 0.56    |
|                                                       | R <sup>2</sup> | 0.99513 | 0.99975 | 0.99906 | 0.99804 | 0.99923 |

Note: for  $\beta = 1$  the KWW expression become the Maxwell equation

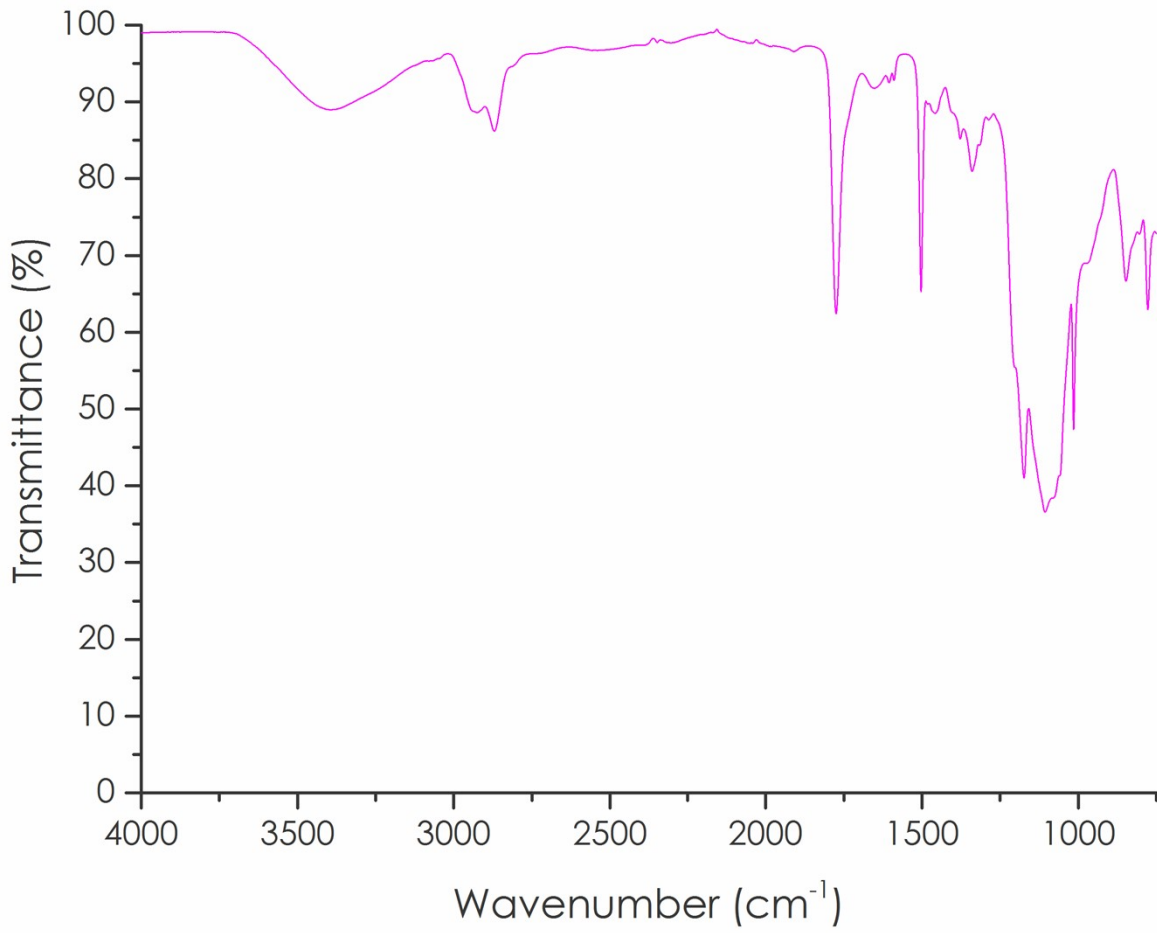

Figure S21. FTIR spectrum of the cured TPE-TAF/BDGE material

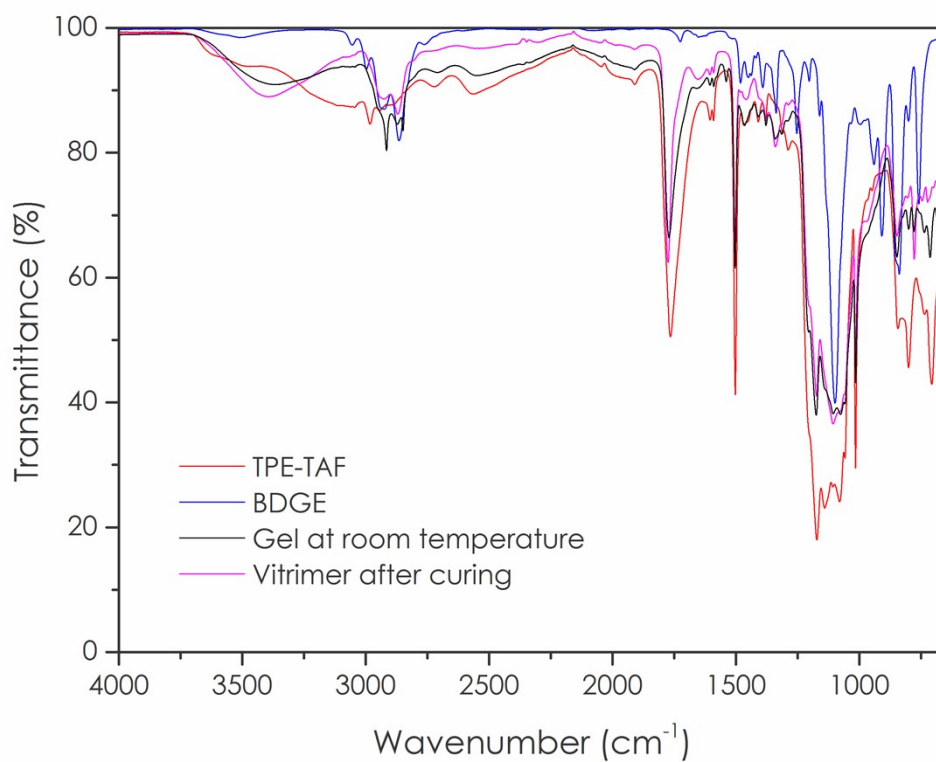

Figure S22. Stacked FTIR spectra of TPE-TAF, BDGE, material after gelation 4 days at room temperature and TPE-TAF/BDGE material after curing 3 h at 150 °C
